# Supplementary material for: Rhombohedral type of LaCoO3 with carbon nanofiber composite as an electrocatalyst enables the amperometry detection of vanillin in food samples
Source: Royal Society of Chemistry journal article supplement (doi:10.1039/d3nj01222k), 2023-01-01
Supplement: d3nj01222k1.pdf [file d3nj01222k1.pdf]

### Supplementary Information

**Rhombohedral type of LaCoO<sub>3</sub> with carbon nanofiber composite as an electrocatalyst enables for amperometry detection of vanillin in food samples**

**Subramaniyan Vinoth, Sea-Fue Wang\***

Department of Materials and Mineral Resources Engineering, National Taipei University of Technology, No. 1, Sec. 3, Chung-Hsiao East Rd., Taipei 106, Taiwan.

**Corresponding author:**

\***Sea-Fue Wang**, Email: [sfwang@ntut.edu.tw](mailto:sfwang@ntut.edu.tw) Tel: +886-2-27712171; Fax: +886-2-27317185.

**No. of. Figures: S7**

**No. of. Tables: S2**

## S1. Chemicals and Reagents

The analytical grade chemicals are Lanthanum (III) nitrate hydrate ( $\text{La}(\text{NO}_3)_3 \cdot 6\text{H}_2\text{O}$ ), Cobalt (II) nitrate hexahydrate ( $\text{Co}(\text{NO}_3)_2 \cdot 6\text{H}_2\text{O}$ ), citric acid ( $\text{HOOC}(\text{CO}_2\text{H})(\text{CH}_2\text{CO}_2\text{H})_2$ ) precursors, carbon nanofiber (CNF), sodium phosphate monobasic ( $\text{NaH}_2\text{PO}_4$ ) and sodium phosphate dibasic ( $\text{Na}_2\text{HPO}_4$ ) are utilized to prepare 0.1 M PBS (phosphate buffer solution) as the supporting electrolyte. Potassium chloride (KCl), potassium ferricyanide ( $\text{K}_3[\text{Fe}(\text{CN})_6]$ ), sodium hydroxide (NaOH), vanillin (VNL), caffeic acid (CA), sucrose (Su), catechol (CA), glucose (Glu), potassium ( $\text{K}^+$ ), ascorbic acid (AA), sodium chloride (NaCl), dopamine (DPA), paracetamol (PA), catechol (CC) and all other chemicals are used without further refinement from Sigma-Aldrich, 98%.

## S2. Materials characterization

As-synthesized  $\text{LaCoO}_3@\text{CNF}$  composite material was studied using phase identification was performed by using X-ray diffraction (XRD) using XRD, Rigaku D/maxB, DMX-2200. Raman spectroscopy (Horiba HR 800UV confocal Raman spectrophotometer). The surface morphology was used in Field Electron-Scanning Electron Microscopy (FE-SEM, Hitachi S4700) and energy dispersive X-ray (EDX, HORIBA EMAX XACT) spectroscopy. X-ray photoelectron spectroscopy (ESCA/Auger Laboratory). AC impedance spectroscopy was performed by  $\Omega$ -metrohm autolab (AUT51770). CHI 6171D Electrochemical work station was functional to carry out the electrochemical measurements in three electrode cells, as well as amperometric (i-t) method. Here, the modified GCE saturated Ag/AgCl and Pt wire were active as working, reference and counter electrodes, respectively.

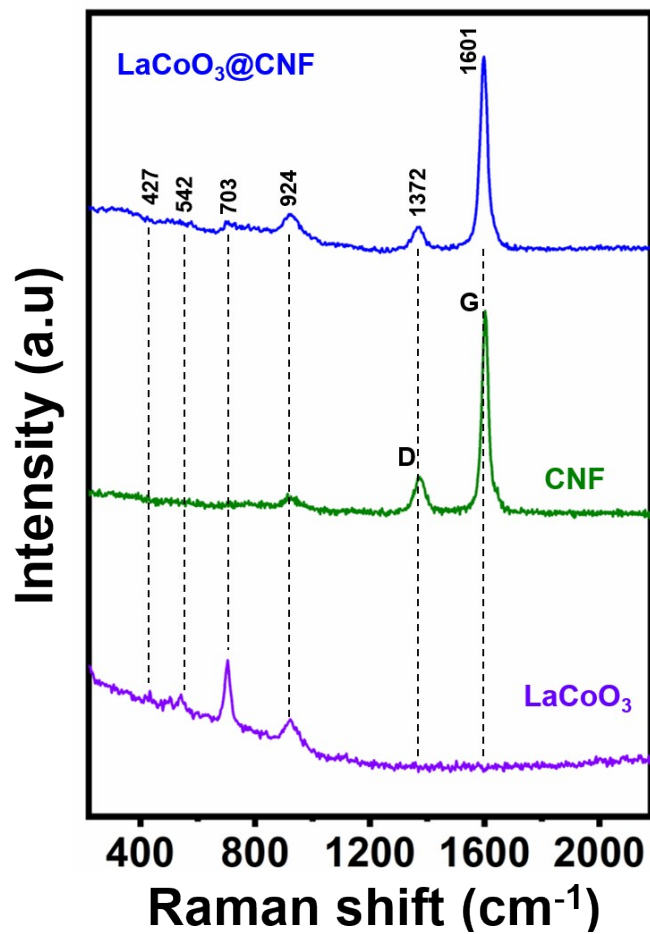

**Fig.S1.** Raman spectra of LCO, CNF and LCO@CNF composite.

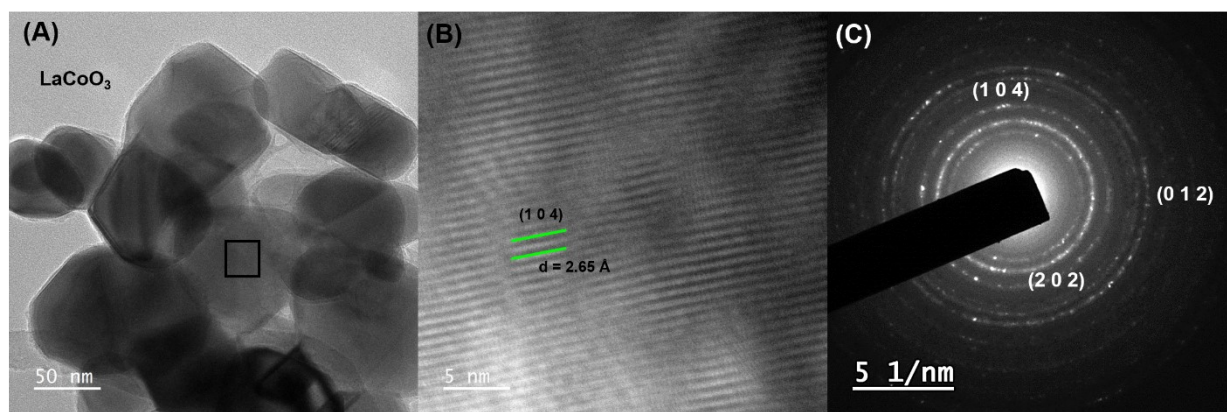

**Fig.S2.** (A) HRTEM image of material, (B-C) LCO images of corresponding lattice fringe and SAED pattern.

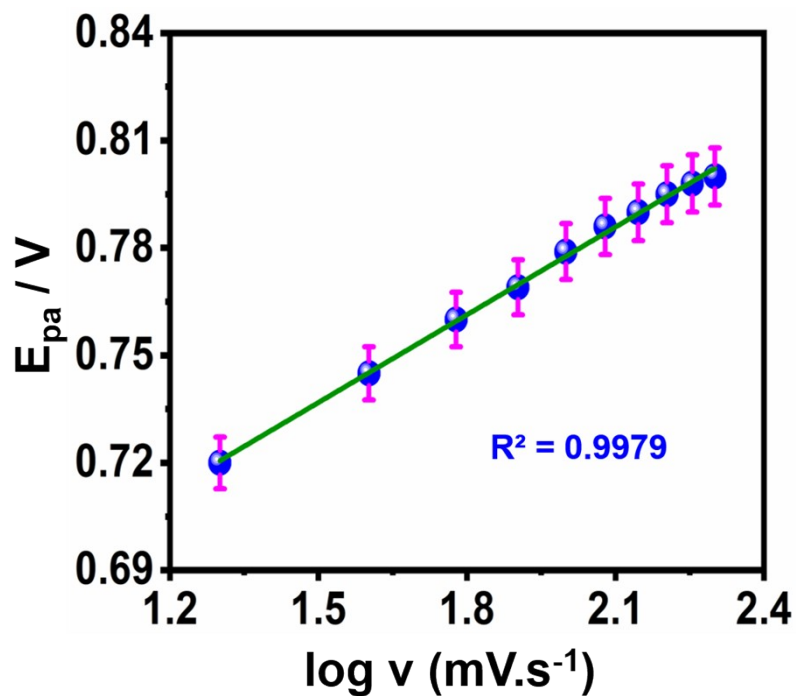

**Fig.S3.** The calibration plot of different scan rate on modified LCO@CNF composite.

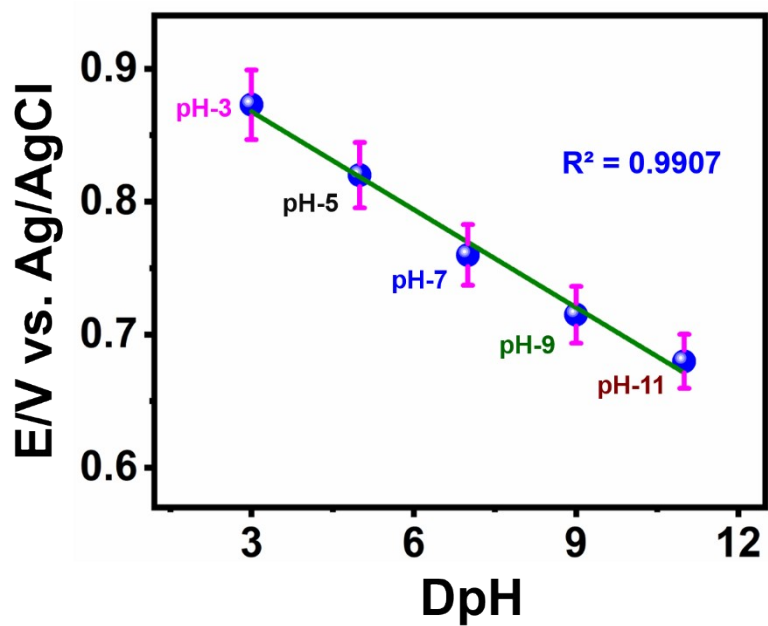

**Fig.S4.** Electrolyte studies of LCO@CNF composite towards VNL in  $DpH$  vs potentials.

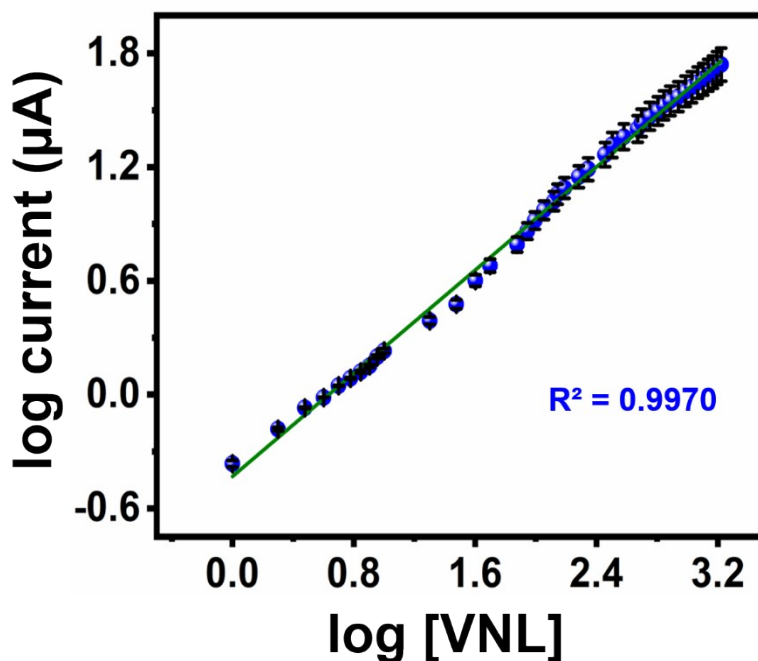

**Fig.S5.** The calibration plot of log current vs log VNL on modified LCO@CNF composite.

**Table.S1.** Comparison table of VNL detection in modified composite with the previous literature.

| Electrode materials                  | Method           | LOD<br>(nM) | Linear range<br>( $\mu$ M) | Real sample                             | Ref. |
|--------------------------------------|------------------|-------------|----------------------------|-----------------------------------------|------|
| <sup>a</sup> CuS-H                   | <sup>j</sup> DPV | 53          | 0.1-46.5                   | Biscuits, Milk powder, Chocolate        | 40   |
| <sup>b</sup> PTY/OL/CNPE             | DPV              | 49          | 2.0-40.0                   | Biscuits                                | 41   |
| <sup>c</sup> PMOMGPE                 | DPV              | 73          | 10.0-35.0                  | Vanilla essence                         | 42   |
| <sup>d</sup> Poly(GA)/(MWCNTs-GT)CPS | DPV              | 199         | 0.50-13.0                  | Milkshake, Cream cake, Vanilla extract. | 39   |
| <sup>e</sup> Ag-Pd/GO                | DPV              | 5           | 0.02-45                    | cookie, pastry, jelly and chocolate     | 43   |
| <sup>f</sup> Arg-G                   | DPV              | 1000        | 2-70                       | ice cream, biscuit                      | 44   |
| <sup>g</sup> BDD electrode           | <sup>k</sup> SWV | 160         | 3.3-98                     | commercial pudding powder               | 45   |

|                                |                 |             |                  |                                             |                     |
|--------------------------------|-----------------|-------------|------------------|---------------------------------------------|---------------------|
| <sup>h</sup> Ag NPs/GN         | SWV             | 332         | 2-100            | biscuit                                     | 46                  |
| CuO@SiO <sub>2</sub>           | DPV             | 53          | 0.05-111.2       | Chocolate, biscuit                          | 47                  |
| <sup>i</sup> poly(T3T)         | DPV             | 40          | 0.1-11.3         | Sugared vanilla,<br>Coffee                  | 48                  |
| Au–Ag alloy                    | <sup>i</sup> -t | 40          | 0.2-50           | Vanilla tea, bean                           | 49                  |
| Fe@Fe <sub>3</sub> C-C         | DPV             | 2.36        | 10-50            | cooky, yogurt, jelly<br>and chocolate       | 50                  |
| <sup>m</sup> AuNPs/Fc-KB/ZIF-8 | SWV             | 3           | 0.01-200         | white chocolate and<br>nougat               | 51                  |
| <b>LCO@CNF</b>                 | <b>i-t</b>      | <b>4.67</b> | <b>0.01-1670</b> | <b>Vanilla ice cream,<br/>Cocoa biscuit</b> | <b>Our<br/>work</b> |

<sup>a</sup>CuS-H - Copper sulfide - hexagonal phase, <sup>b</sup>PTY/OL/CNPE - Poly (titan yellow) and octoxynol-9 modified carbon nanotube paste electrode, <sup>c</sup>PMOMGPE – Poly methyl orange modified graphene, <sup>d</sup>Poly(GA)/(MWCNTs-GT)CPS - Poly(glutamic acid)/(multi-walled carbon nanotubes-graphite) composite, <sup>e</sup>Ag-Pd/GO - Ag-Pd bimetallic nanoparticles-decorated graphene oxide, <sup>f</sup>Arg-G-Arginine-graphene, <sup>g</sup>BDD electrode - Boron-doped diamond electrode, <sup>h</sup>Ag NPs/GN - Silver nanoplates/graphene, <sup>i</sup>poly(T3T) - Poly(1H-1,2,4-triazole-3-thiol/Au, <sup>j</sup>DPV – different pulse voltammetry, <sup>k</sup>SWV - square wave voltammetry, <sup>i</sup>-t – amperometry (i-t) method, <sup>m</sup>AuNPs/Fc-KB/ZIF-8- gold nanoparticles/ferrocene-Ketjen black/zeolite-like MOFs.

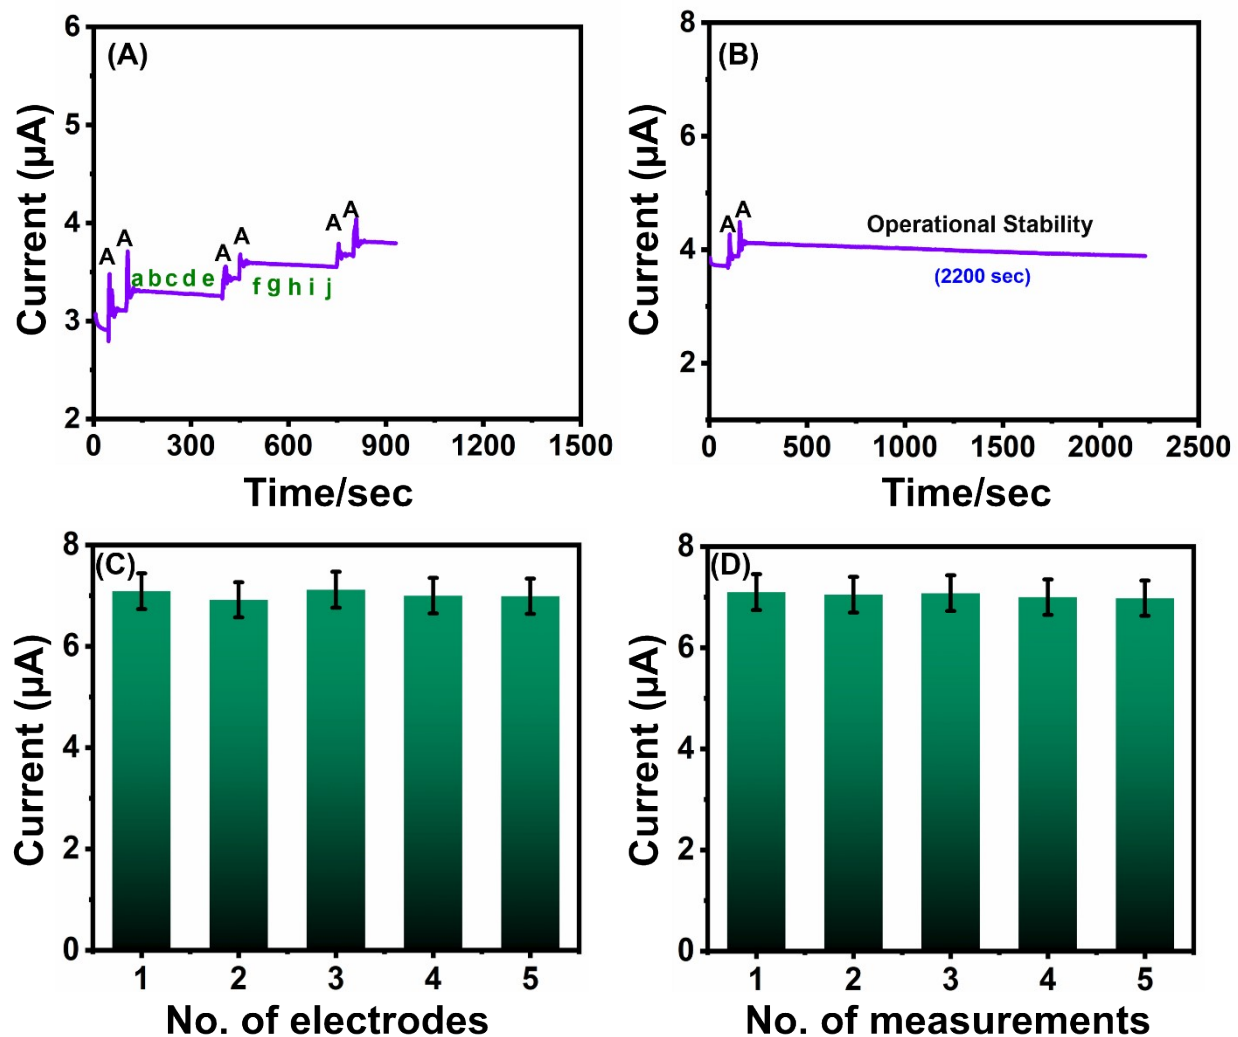

**Fig.S6.** (A) Anti-interfering analysis by (i-t) method (A: VNL, a: CA, b: Su, c: CC, d: Glu, e:  $\text{K}^+$ , f: AA, g:  $\text{Cl}^-$ , h:  $\text{Na}^+$ , i: DPA and j: PA), (B) The operational stability studies of modified electrode, (C-D) Bar diagrams of reproducibility and repeatability studies of LCO@CNF towards VNL.

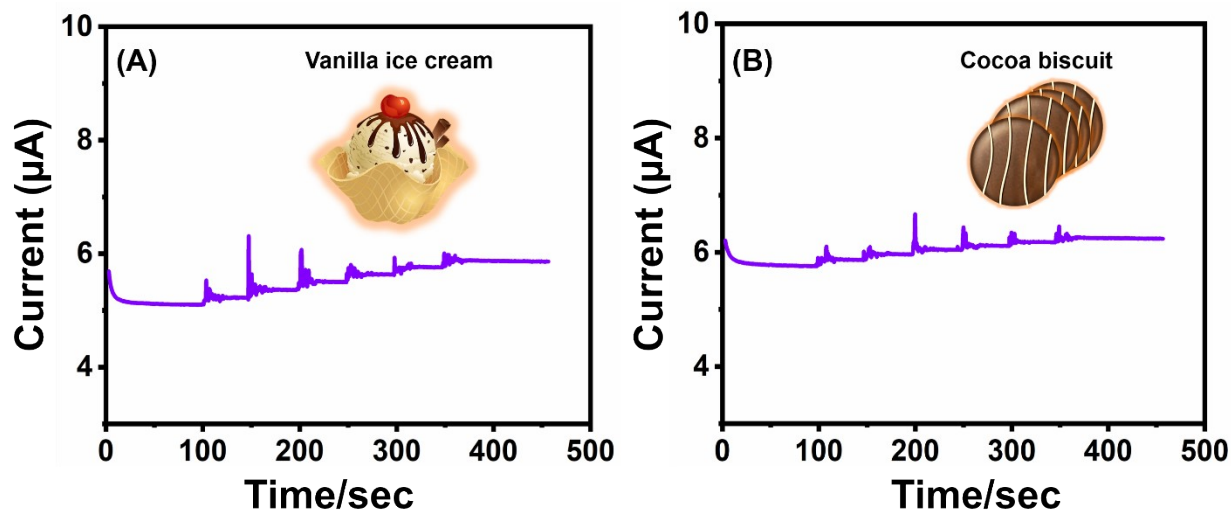

Fig.S7. (A-B) Real samples analysis of vanilla ice cream and cocoa biscuit.

Table.S2. Determination of VNL in food samples with modified composites.

| Effluents         | Spiked ( $\mu\text{M}$ ) | Found ( $\mu\text{M}$ ) | *RSD (%) | Recovery (%) |
|-------------------|--------------------------|-------------------------|----------|--------------|
| Vanilla ice cream | 0                        | $0.21 \pm 0.0038$       | 1.80     | -            |
|                   | 5                        | $4.96 \pm 0.071$        | 1.43     | 100.80       |
|                   | 10                       | $9.75 \pm 0.24$         | 2.46     | 102.56       |
|                   | 15                       | $14.95 \pm 0.44$        | 2.94     | 100.30       |
|                   | 20                       | $19.88 \pm 0.689$       | 3.46     | 99.60        |
|                   | 25                       | $24.85 \pm 0.907$       | 3.64     | 99.40        |
|                   | 30                       | $29.75 \pm 1.175$       | 3.94     | 99.16        |
| Cocoa biscuit     | 0                        | $0.13 \pm 0.0017$       | 1.30     | -            |
|                   | 5                        | $4.25 \pm 0.11$         | 2.58     | 100.30       |
|                   | 10                       | $9.15 \pm 0.30$         | 3.27     | 100.92       |
|                   | 15                       | $14.28 \pm 0.49$        | 3.43     | 99.20        |
|                   | 20                       | $19.65 \pm 0.72$        | 3.66     | 98.25        |
|                   | 25                       | $24.85 \pm 0.96$        | 3.86     | 99.40        |
|                   | 30                       | $29.95 \pm 1.17$        | 3.90     | 99.83        |

\*RSD = Relative standard deviation



## References

- 39 N. Hareesha, J. G. Manjunatha, B. M. Amrutha, N. Sreeharsha, S. M. B. Asdaq and M. K. Anwer, *Colloids Surf A Physicochem Eng Asp*, 2021, **626**, 127042.
- 40 S. Radhakrishnan, J. Mathiyarasu and B.-S. Kim, *Appl Mater Today*, 2022, **27**, 101428.
- 41 G. Tigari, J. G. Manjunatha, E. S. D'Souza and N. Sreeharsha, *ChemistrySelect*, 2021, **6**, 2700–2708.
- 42 A. B. Monnappa, J. G. G. Manjunatha, A. S. Bhatt and H. Nagarajappa, *Journal of Science: Advanced Materials and Devices*, 2021, **6**, 415–424.
- 43 J. Li, H. Feng, J. Li, J. Jiang, Y. Feng, L. He and D. Qian, *Electrochim Acta*, 2015, **176**, 827–835.
- 44 Y. Zhao, Y. Du, D. Lu, L. Wang, D. Ma, T. Ju and M. Wu, *Analytical Methods*, 2014, **6**, 1753–1758.
- 45 Y. Yardım, M. Gülcan and Z. Şentürk, *Food Chem*, 2013, **141**, 1821–1827.
- 46 L. Huang, K. Hou, X. Jia, H. Pan and M. Du, *Materials Science and Engineering: C*, 2014, **38**, 39–45.
- 47 A. Venkadesh, J. Mathiyarasu and S. Radhakrishnan, *Mater Today Chem*, 2021, **22**, 100554.
- 48 T. T. Calam, *Food Chem*, 2020, **328**, 127098.
- 49 D. Zheng, C. Hu, T. Gan, X. Dang and S. Hu, *Sens Actuators B Chem*, 2010, **148**, 247–252.
- 50 J. Sun, T. Gan, K. Wang, Z. Shi, J. Li and L. Wang, *Analytical Methods*, 2014, **6**, 5639–5646.
- 51 Y. Sun, X. Jiang, H. Jin and R. Gui, *Anal Chim Acta*, 2019, **1083**, 101–109.
